# Supplementary material
Source: publisher figshare collection journal article supplement (https://frontiersin.figshare.com/ndownloader/files/17461913)
Supplement: Supplementary file [file 17461913]

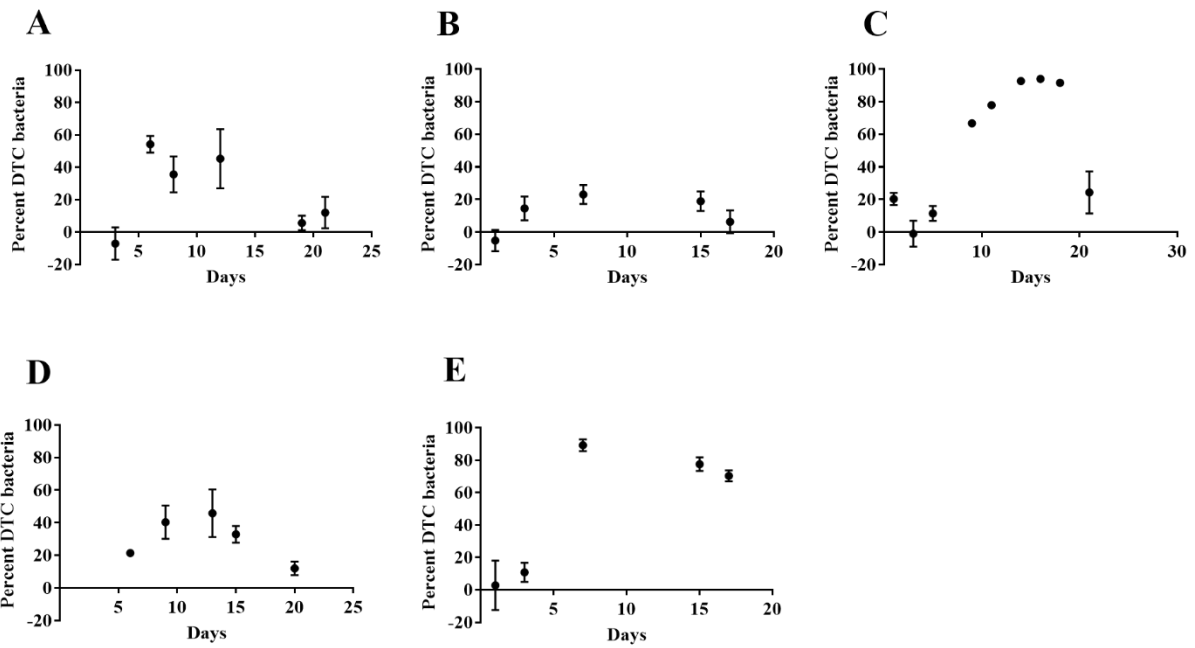

**Fig. S1 – Percentage distribution of DTC bacteria over time in different growth models**

The percentage of DTC *Pseudomonas aeruginosa* after anoxic conditioning in the bead biofilm model (A), filter biofilm model (B), batch cultures (C), colonies (D). Day 28 is missing in figure C because the value was lower than -20 % (-20.21 %). The percentage of DTC *Staphylococcus aureus* after anoxic conditioning in the filter biofilm model (E). Bars represent SEM. For some points, the error bars are shorter than the height of the symbol and therefore not displayed.
